# Supplementary material
Source: Springer Nature journal article supplement (https://www.springermedizin.de/resource/supplementary/12879_2003_91_MOESM3_ESM.pdf/9448256)

# (A) Commercial Tests

## Summary ROC Curve

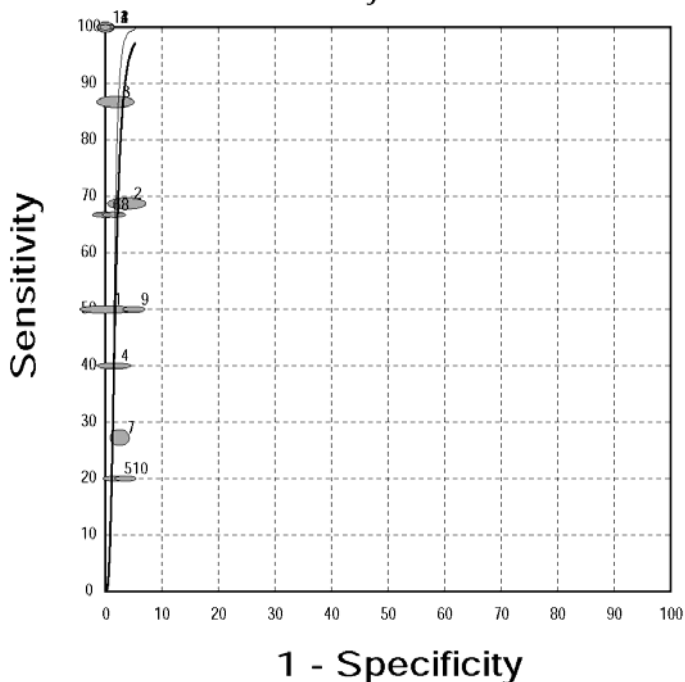

# (B) In-house Tests

## Summary ROC Curve

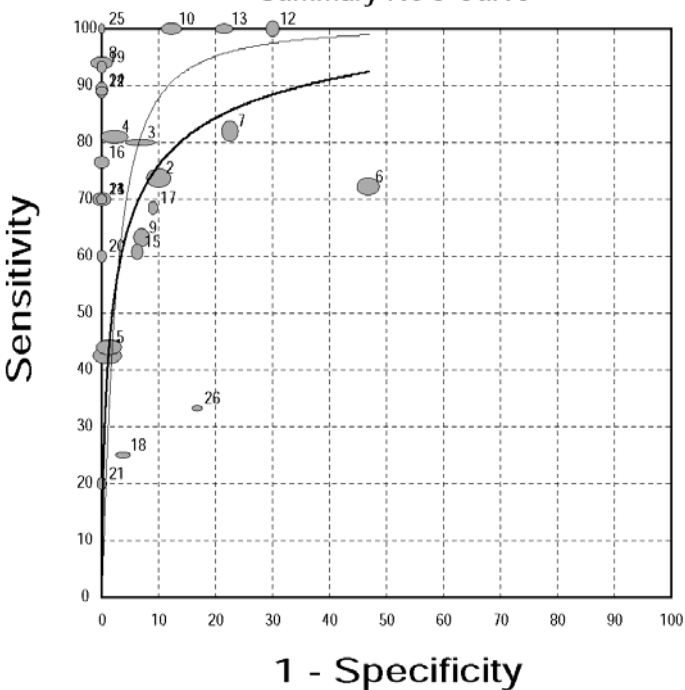

Supplement: MOESM3 [file 9448256]
